# Supplementary material
Source: ML conference proceedings conference paper supplement (https://aclanthology.org/D17-1047)

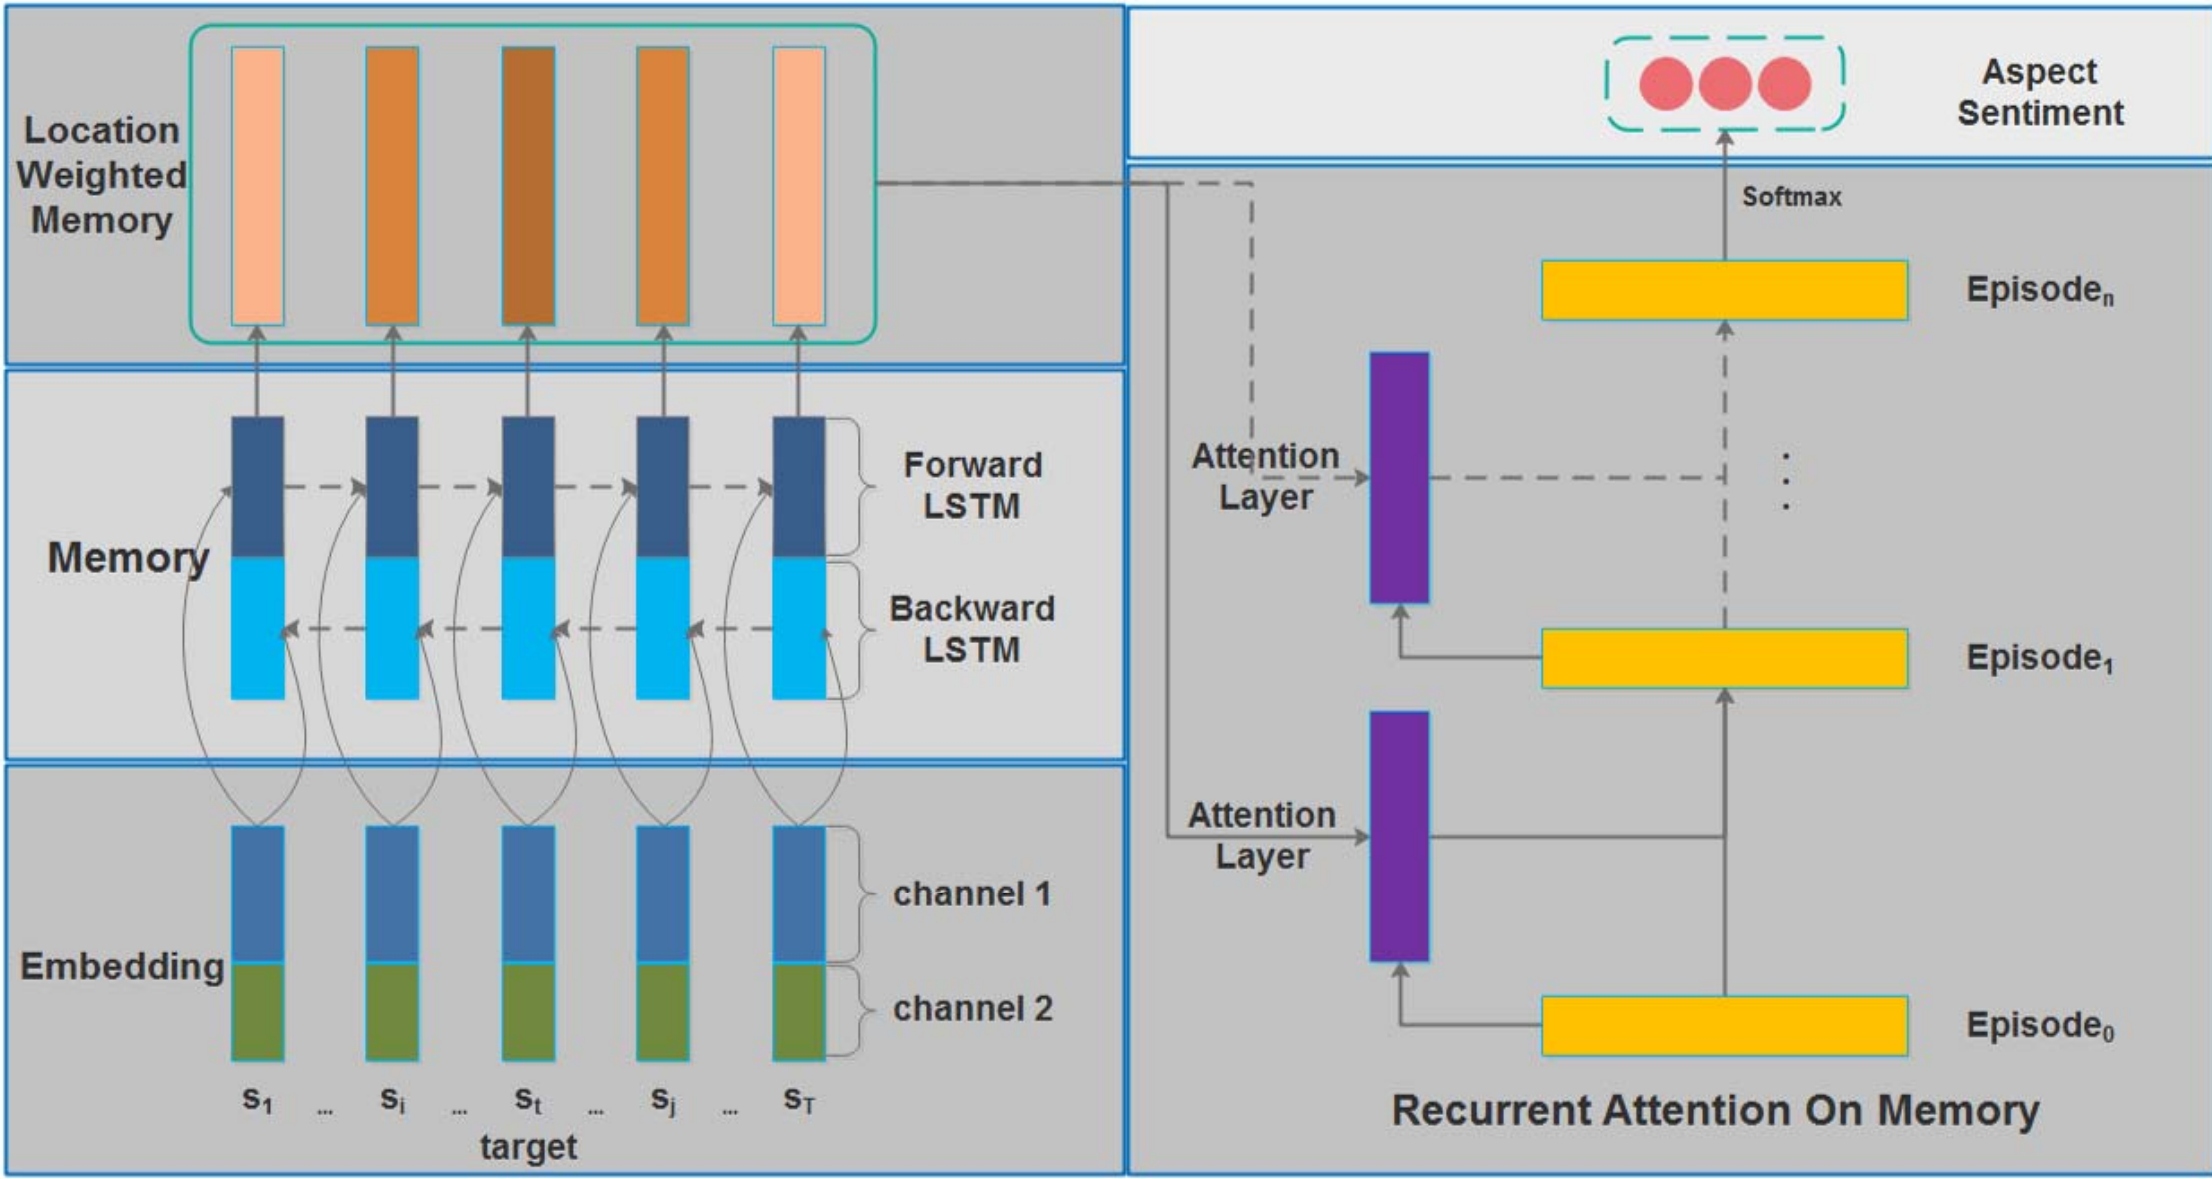

Supplement: Attachment [file D17-1047.Attachment.zip]

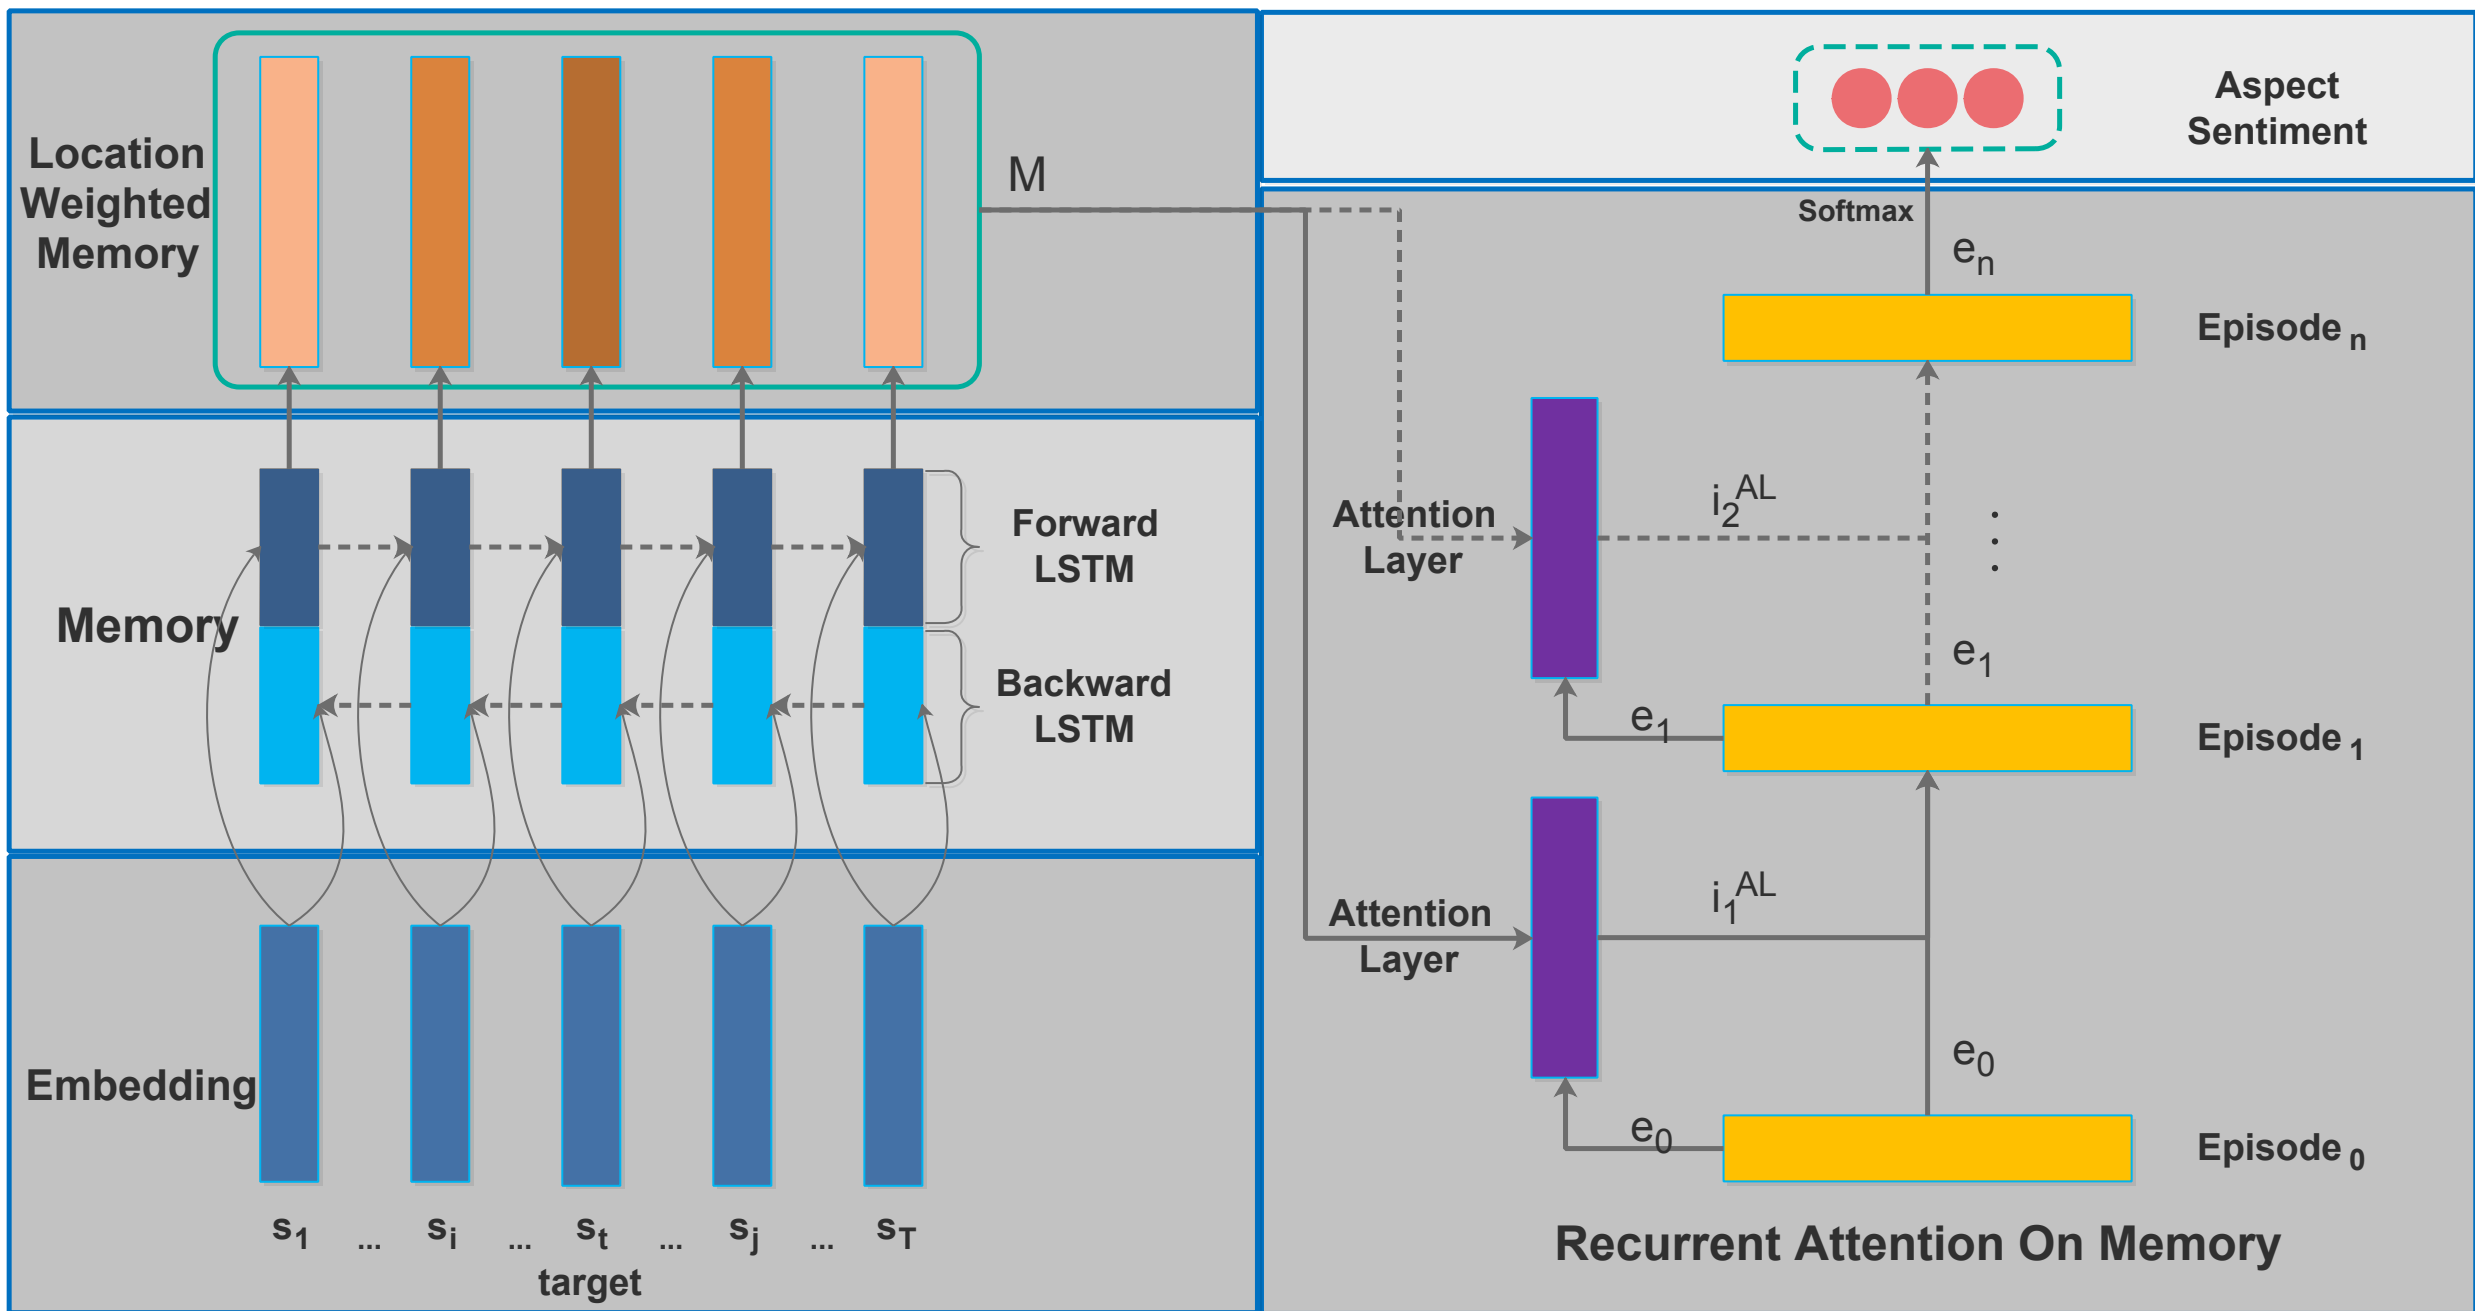

Supplement: Attachment [file D17-1047.Attachment.zip]
